# Supplementary material for: Expression of OsTPX Gene Improves Cellular Redox Homeostasis and Photosynthesis Efficiency in Synechococcus elongatus PCC 7942
Source: PubMed Central journal article supplement (PMC6297720; doi:10.3389/fpls.2018.01848), 2018-12-11
Supplement: Data_Sheet_1.pdf [file Data_Sheet_1.pdf]

Supplementary Materials for

**Expression of *OsTPX* Gene Improves Cellular Redox Homeostasis and Photosynthesis Efficiency  
in *Synechococcus elongatus* PCC 7942**

Young-Saeng Kim<sup>1,†</sup>, Jin-Ju Kim<sup>2,3,†</sup>, Seong-Im Park<sup>2,3</sup>, Spencer Diamond<sup>5</sup>, Joseph S. Boyd<sup>5</sup>,

Arnaud Taton<sup>5</sup>, Il-Sup Kim<sup>4,\*</sup>, James W. Golden<sup>5,\*</sup>, and Ho-Sung Yoon<sup>2,3,4,\*</sup>

<sup>1</sup>Research Institute of Ulleung-do and Dok-do, <sup>2</sup>Department of Biology, College of Natural Sciences,  
<sup>3</sup>School of Life Sciences, BK21 Plus KNU Creative BioResearch Group, <sup>4</sup>Advanced Bio-resource  
Research Center, Kyungpook National University, Daegu 41566, Korea; <sup>5</sup>Division of Biological  
Sciences, University of California San Diego, La Jolla, California 92093, USA

Corresponding author. Email: Il-Sup Kim: 92kis@hanmail.net;

James W. Golden: jwgolden@ucsd.edu; Ho-Sung Yoon: hsy@knu.ac.kr

**Supplementary Figure S1**

**Supplementary Tables S1 to S4**

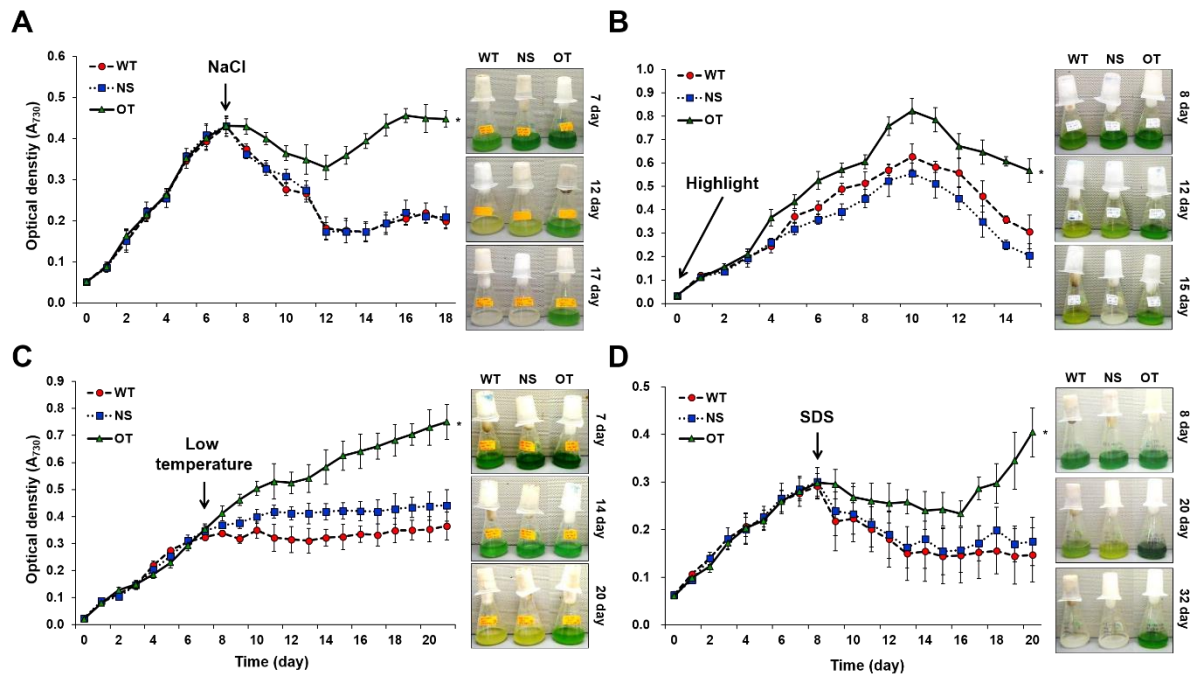

**Supplementary Figure S1.** Growth curve measurement of WT, NS, and OT strains under various abiotic stresses. The OT strain grows better than other strains under various stress conditions. **(A–D)** Strains were grown in only BG11 medium, and the initial optical density at 730 nm was adjusted to 3.0. Next, each sample was exposed to the following stress treatments: **(A)** 200 mM NaCl after 7 days, **(B)** 250  $\mu$ E high light intensity during the first day, **(C)** 10  $^{\circ}$ C low temperature after 7 days, and **(D)** 20% SDS after 8 days. After culturing at 30  $^{\circ}$ C with shaking, aliquots of each sample were collected daily and absorbance was measured at 730 nm. Error bars indicate  $\pm$  SD of three independent experiments. Asterisks indicate significant differences between treatments as estimated by Student's *t*-test ( $P < 0.05$ ).

**Supplementary Table S1.** Cyanobacterial strains and plasmids used in this study

| Strain or Plasmid         | Characteristic(s)                                                                                                                                                                                                | Antibiotic resistance | Source or reference |
|---------------------------|------------------------------------------------------------------------------------------------------------------------------------------------------------------------------------------------------------------|-----------------------|---------------------|
| <b>Strains</b>            |                                                                                                                                                                                                                  |                       |                     |
| AMC06                     | Wild type <i>Synechococcus elongatus</i> PCC 7942                                                                                                                                                                | none                  | Lab collection      |
| DH5 $\alpha$              | <i>Escherichia coli</i> cloning host                                                                                                                                                                             | none                  | Lab collection      |
| <b>Plasmids</b>           |                                                                                                                                                                                                                  |                       |                     |
| Relevant characteristics* |                                                                                                                                                                                                                  |                       |                     |
| <i>pGA2897::OsTPX</i>     | The <i>pGA2897</i> binary vector plasmids that contained the maize ubiquitin promoter ( <i>Ubi</i> ) and <i>OsTPX</i> into the <i>A. tumefaciens</i> strain <i>LBA4404</i> via electroporation; Hpt <sup>r</sup> | Hpt                   | This work           |
| <i>pCV0069</i>            | <i>S. elongatus</i> carrying <i>pCV0069</i> as a single recombinant; Nat <sup>r</sup>                                                                                                                            | Nat                   | Lab collection      |
| <i>pCV0069::OsTPX</i>     | S7942NS2-Nat1-Ptrc/Swal-TPX-RBS_OsTPX, 5815 bp, Nat <sup>r</sup> , for IPTG-inducible <i>OsTPX</i> gene expression                                                                                               | Nat                   | This work           |

\* Abbreviations for antibiotics: nourseothricin (Nat) and hygromycin B phosphotransferase (Hpt).

**Supplementary Table S2.** Primer sequences for PCR amplification

|                     | <b>Name</b>    | <b>Sequence</b>                                              |
|---------------------|----------------|--------------------------------------------------------------|
| <i>O. sativa</i>    | OsTPX-F        | CACCAATCCCCTCCTCATCCACT                                      |
|                     | OsTPX-R        | AAAAACTCCCTACATCCATCACC                                      |
|                     | Tubulin-F      | GAGTACCCTGACCGCATGAT                                         |
|                     | Tubulin-R      | GTGGTCAGCTTGAGAGTCCT                                         |
|                     | OsTPX-RT-F     | GCCGCTCCCACCGCAGCAGC                                         |
|                     | OsTPX-RT-R     | GGGCTTGTCGGAGAGGTCCATC                                       |
| <i>S. elongatus</i> | rpoA-F         | GCCGCCTGCTGCTCCTCCCT                                         |
|                     | rpoA-R         | AGCAAGTCAGCAACGGAGTTC                                        |
|                     | NS2-F          | GTC AACGTAAATGCATGCCGC                                       |
|                     | NS2-R          | GGTCACTACTTGGTAGCAACTC                                       |
|                     | OsTPX-RT-PCR-F | ATGGCCGCCTGCTGCTCCTCCCT                                      |
|                     | OsTPX-RT-PCR-R | CTGTCGAAGTGCAACTACTTGAGGACCAGC                               |
|                     | OsTPX-F-Swal   | TGCGGATCCTAAGGAGGAAAATTTATGGCCGCCTGCTGCTCCTCCCTCGCCACCGCCG   |
|                     | OsTPX-R-Swal   | GCCGGGGAGCTCCTTCATTTATTTTATAGATGGCCGCGAAGTACTCCTTGCTTCCCTGGG |

**Supplementary Table S3. Upregulated genes expression levels under H<sub>2</sub>O<sub>2</sub> stress screened using RNA seq**

| Gene symbol                | Fold change  | Protein ID     | Product                                                    |
|----------------------------|--------------|----------------|------------------------------------------------------------|
| <b>Redox balance</b>       |              |                |                                                            |
| SYNPCC7942_RS13385         | <b>5.193</b> | WP_040113194.1 | ferredoxin                                                 |
| SYNPCC7942_RS05790         | <b>2.605</b> | WP_011377875.1 | ferredoxin-thioredoxin reductase                           |
| SYNPCC7942_RS08440         | <b>2.457</b> | WP_011244741.1 | catalase peroxidase                                        |
| SYNPCC7942_RS07035         | <b>2.051</b> | WP_011378008.1 | flavodoxin2                                                |
| SYNPCC7942_RS02235         | <b>1.825</b> | WP_011377579.1 | glutathione peroxidase                                     |
| SYNPCC7942_RS13770         | <b>1.745</b> | WP_011242314.1 | flavodoxin                                                 |
| <b>Photosynthesis</b>      |              |                |                                                            |
| SYNPCC7942_RS10560         | <b>2.359</b> | WP_011378308.1 | chlorophyll synthase ChlG                                  |
| SYNPCC7942_RS02240         | <b>1.866</b> | WP_011243390.1 | magnesium protoporphyrin IX methyltransferase              |
| SYNPCC7942_RS05735         | <b>1.741</b> | WP_071818114.1 | high light inducible protein                               |
| SYNPCC7942_RS09665         | <b>1.508</b> | WP_011244498.1 | magnesium-protoporphyrin IX monomethyl ester cyclase       |
| <b>Ion homeostasis</b>     |              |                |                                                            |
| SYNPCC7942_RS08465         | <b>2.338</b> | WP_011244737.1 | potassium channel protein                                  |
| SYNPCC7942_RS05795         | <b>2.209</b> | WP_011242728.1 | ABC transporter ATP-binding protein                        |
| SYNPCC7942_RS07205         | <b>2.155</b> | WP_011242460.1 | Fe <sup>3+</sup> ABC transporter substrate-binding protein |
| SYNPCC7942_RS05775         | <b>2.115</b> | WP_011377873.1 | haemolysin-type calcium-binding repeat                     |
| SYNPCC7942_RS05545         | <b>2.102</b> | WP_011242780.1 | K <sup>+</sup> transporter                                 |
| <b>Molecular chaperone</b> |              |                |                                                            |
| SYNPCC7942_RS11715         | <b>2.083</b> | WP_011378399.1 | molecular chaperone DnaJ                                   |
| SYNPCC7942_RS12135         | <b>1.811</b> | WP_071818122.1 | molecular chaperone DnaJ                                   |
| SYNPCC7942_RS09200         | <b>1.686</b> | WP_011244591.1 | molecular chaperone HtpG                                   |

**Supplementary Table S4. Upregulated genes expression levels under normal and H<sub>2</sub>O<sub>2</sub> stress screened using RNA seq (raw data\_log normalization)**

| Protein ID                 | Product                                                    | NORMAL |        | STRESS |        |
|----------------------------|------------------------------------------------------------|--------|--------|--------|--------|
|                            |                                                            | WT     | OT     | WT     | OT     |
| WP_011244671.1             | thioredoxin family protein                                 | 11.673 | 11.291 | 11.613 | 11.276 |
| WP_011244428.1             | thioredoxin reductase                                      | 13.837 | 13.388 | 13.683 | 13.390 |
| <b>Redox balance</b>       |                                                            |        |        |        |        |
| WP_040113194.1             | ferredoxin                                                 | 6.805  | 6.712  | 7.040  | 9.088  |
| WP_011377875.1             | ferredoxin-thioredoxin reductase                           | 10.439 | 10.241 | 9.977  | 11.622 |
| WP_011244741.1             | catalase peroxidase                                        | 10.599 | 10.836 | 9.587  | 12.133 |
| WP_011378008.1             | flavodoxin2                                                | 11.828 | 12.292 | 11.657 | 13.329 |
| WP_011377579.1             | glutathione peroxidase                                     | 8.921  | 8.426  | 8.562  | 9.294  |
| WP_011242314.1             | flavodoxin                                                 | 9.770  | 10.659 | 10.967 | 11.462 |
| <b>Photosynthesis</b>      |                                                            |        |        |        |        |
| WP_011378308.1             | chlorophyll synthase ChlG                                  | 12.196 | 12.395 | 11.568 | 13.634 |
| WP_011243390.1             | magnesium protoporphyrin IX methyltransferase              | 10.042 | 10.457 | 10.071 | 11.357 |
| WP_071818114.1             | high light inducible protein                               | 11.013 | 11.126 | 10.907 | 11.926 |
| WP_011244498.1             | magnesium-protoporphyrin IX monomethyl ester cyclase       | 11.386 | 11.382 | 11.203 | 11.975 |
| <b>Ion homeostasis</b>     |                                                            |        |        |        |        |
| WP_011244737.1             | potassium channel protein                                  | 11.004 | 11.177 | 10.546 | 12.402 |
| WP_011242728.1             | ABC transporter ATP-binding protein                        | 11.432 | 11.746 | 11.898 | 12.889 |
| WP_011242460.1             | Fe <sup>3+</sup> ABC transporter substrate-binding protein | 10.619 | 10.737 | 10.247 | 11.845 |
| WP_011377873.1             | haemolysin-type calcium-binding repeat                     | 11.326 | 11.097 | 10.732 | 12.177 |
| WP_011242780.1             | K <sup>+</sup> transporter                                 | 12.286 | 12.425 | 11.667 | 13.497 |
| <b>Molecular chaperone</b> |                                                            |        |        |        |        |
| WP_011378399.1             | molecular chaperone DnaJ                                   | 10.952 | 11.021 | 10.633 | 12.080 |
| WP_071818122.1             | molecular chaperone DnaJ                                   | 12.849 | 12.303 | 12.558 | 13.160 |
| WP_011244591.1             | molecular chaperone HtpG                                   | 13.259 | 13.155 | 13.215 | 13.909 |
